# Supplementary material for: Diminished neutralizing activity against the XBB1.5 strain in 55.9% of individuals post 6 months COVID-19 mRNA booster vaccination: insights from a pseudovirus assay on 1,353 participants in the Fukushima vaccination community survey, Japan
Source: PubMed Central journal article supplement (PMC10983612; doi:10.3389/fimmu.2024.1337520), 2024-03-18

# Diminished neutralizing activity against the XBB1.5 strain in 55.9% of individuals post 6 months COVID-19 mRNA booster vaccination: Insights from a pseudovirus assay on 1,353 participants in the Fukushima Vaccination Community Survey, Japan

Tianchen Zhao<sup>1,2\*</sup> & Yuta Tani<sup>1,3\*</sup> & Chieko Makino-Okamura<sup>4,5\*</sup>, Morihito Takita<sup>1,2</sup>, Chika Yamamoto<sup>1,2</sup>, Eiki Kawahara<sup>4,5,6</sup>, Toshiki Abe<sup>2</sup>, Sota Sugiura<sup>1</sup>, Hiroki Yoshimura<sup>1,2</sup>, Taiga Uchiyama<sup>2</sup>, Isato Yamazaki<sup>4,5,6</sup>, Harumichi Ishigame<sup>4,8</sup>, Takaharu Ueno<sup>9</sup>, Kazu Okuma<sup>9</sup>, Masatoshi Wakui<sup>3</sup>, Hidehiro Fukuyama<sup>4,5,6,7\*</sup> & Masaharu Tsubokura<sup>1,2\*</sup>

<sup>1</sup> General Incorporated Association for Comprehensive Disaster Health Management Research Institute, Tokyo, Japan

<sup>2</sup> Department of Radiation Health Management, Fukushima Medical University School of Medicine, Fukushima, Japan

<sup>3</sup> Department of Laboratory Medicine, Keio University School of Medicine, Tokyo, Japan

<sup>4</sup> Division of Immunology, Near-InfraRed Photo-Immunotherapy Research Institute, Kansai Medical University, Hirakata, Osaka, 573-1010, Japan

<sup>5</sup> Infectious Diseases Research Unit, RIKEN Center for Integrative Medical Sciences, Kanagawa, Japan.

<sup>6</sup> Cell Integrative Science Laboratory, Graduate School of Medical Life Science, Yokohama City University, Kanagawa, Japan.

<sup>7</sup> INSERM EST, 67037 Strasbourg Cedex 2, France.

<sup>8</sup> Laboratory for Tissue Dynamics, RIKEN Center for Integrative Medical Sciences, Kanagawa, Japan.

<sup>9</sup> Department of Microbiology, Kansai Medical University, School of Medicine, Hirakata, Osaka, 573-1010, Japan.

<sup>2</sup>Laboratory X, Institute X, Department X, Organization X, City X, State XX (only USA, Canada and Australia), Country

## \* Correspondence:

Corresponding Author Hidehiro Fukuyama and Masaharu Tsubokura  
[email@uni.edu](mailto:email@uni.edu) [Hidehiro.fukuyama@gmail.com](mailto:Hidehiro.fukuyama@gmail.com) and [tsubo-m@fmu.ac](mailto:tsubo-m@fmu.ac).

## 1. Supplementary Tables and Figures

**Supplementary Table 1. Results of Spearman's correlation analysis for variables in ordered logistic regression**

| Variables                      | Wuhan          | XBB1.5         | Age            | Smoking       | Drinking | Comorbidity   | Days from the last vaccination | Type of the last vaccination | Past infection |
|--------------------------------|----------------|----------------|----------------|---------------|----------|---------------|--------------------------------|------------------------------|----------------|
| Wuhan                          | -              | -              | -              | -             | -        | -             | -                              | -                            | -              |
| XBB1.5                         | <b>.400**</b>  | -              | -              | -             | -        | -             | -                              | -                            | -              |
| Age                            | 0.001          | <b>.096**</b>  | -              | -             | -        | -             | -                              | -                            | -              |
| Smoking                        | 0.033          | 0.004          | -0.036         | -             | -        | -             | -                              | -                            | -              |
| Drinking                       | 0.049          | 0.049          | 0.003          | <b>.096**</b> | -        | -             | -                              | -                            | -              |
| Comorbidity                    | 0.032          | <b>.087**</b>  | <b>.255**</b>  | -0.048        | 0.002    | -             | -                              | -                            | -              |
| Days from the last vaccination | <b>.069**</b>  | 0.036          | <b>-.176**</b> | 0.012         | -0.001   | -0.03         | -                              | -                            | -              |
| Type of the last vaccination   | 0.015          | 0.043          | <b>.208**</b>  | -0.007        | -0.006   | 0.051         | <b>-.540**</b>                 | -                            | -              |
| Past Infection                 | <b>-.226**</b> | <b>-.153**</b> | <b>-.122**</b> | <b>-.061*</b> | -0.015   | <b>-.052*</b> | <b>.056*</b>                   | <b>-.099**</b>               | -              |

\*,  $p < 0.05$ , \*\*;  $p < 0.01$ , \*\*\*;  $p < 0.001$

**Supplementary Table 2. Characteristics of individuals with a bivalent vaccination and a history of infection yet exhibiting minimal neutralizing titers against the Wuhan and XBB1.5 strains**

| ID   | sex    | age | BMI     | medication | comorbidity       | group | The type of the last vaccination | Blood collection date | Days elapsed from the last vaccination | IgG(N) [AU/mL] | Neutralizing titers |                      |
|------|--------|-----|---------|------------|-------------------|-------|----------------------------------|-----------------------|----------------------------------------|----------------|---------------------|----------------------|
|      |        |     |         |            |                   |       |                                  |                       |                                        |                | Wuhan strain [IC50] | XBB1.5 strain [IC50] |
| 2790 | female | 24  | missing | none       | missing           | V3+Bi | Moderna BA.1/BA.2                | 2023/4/4              | 171                                    | 34.31          | 0                   | 0                    |
| 2782 | female | 30  | 19.0    | none       | none              | V3+Bi | Pfizer BA.4/BA.5                 | 2023/4/5              | 132                                    | 29.42          | 0                   | 0                    |
| 2831 | male   | 31  | 23.6    | none       | none              | V3    | Pfizer monovalent                | 2023/3/29             | 429                                    | 25.95          | 0                   | 0                    |
| 665  | female | 33  | 18.4    | NSAIDs     | none              | V3    | Moderna monovalent               | 2023/4/18             | 435                                    | 24.43          | 0                   | 0                    |
| 691  | female | 34  | 26.2    | none       | none              | V3+Bi | Pfizer BA.4/BA.5                 | 2023/4/17             | 146                                    | 26.21          | 0                   | 0                    |
| 685  | female | 48  | 20.4    | none       | none              | V3    | Pfizer monovalent                | 2023/4/17             | 426                                    | 134.59         | 0                   | 0                    |
| 190  | female | 80  | 24.7    | none       | HT, DLP, OSA, DVT | V4+Bi | Pfizer BA.4/BA.5                 | 2023/3/27             | 110                                    | 15.62          | 0                   | 0                    |

HT, hypertension; DLP, Dyslipidemia; OSA, Sleep Apnea Syndrome or Obstructive Sleep Apnea; DVT, Deep Vein Thrombosis

Supplementary Figure 1. Timeline of the blood collection and the vaccination

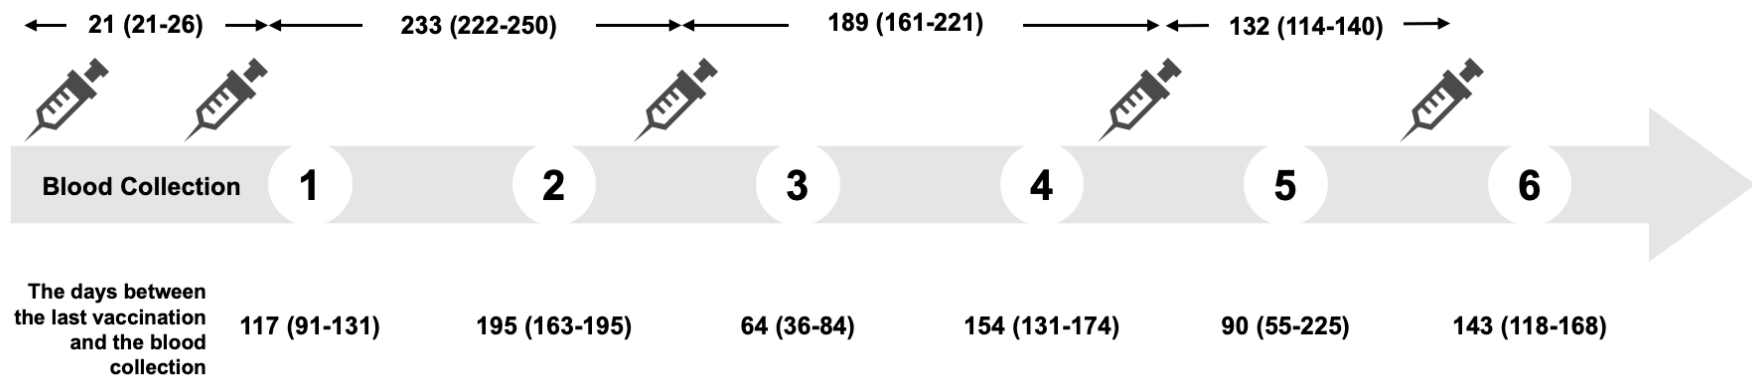

The syringe icon in the figure indicates the timing of vaccination, and the numbers represent the frequency of blood collection. The results presented in this paper correspond to the outcome of the sixth blood collection. The numbers in the figure represent the median (Q1-Q3). It is important to note that not everyone has received the vaccine at these specific times; this is a schematic representation.

Supplementary Figure 2. Typical inhibition curves of neutralization assays and heatmap of ID<sub>50</sub> and ID<sub>80</sub>

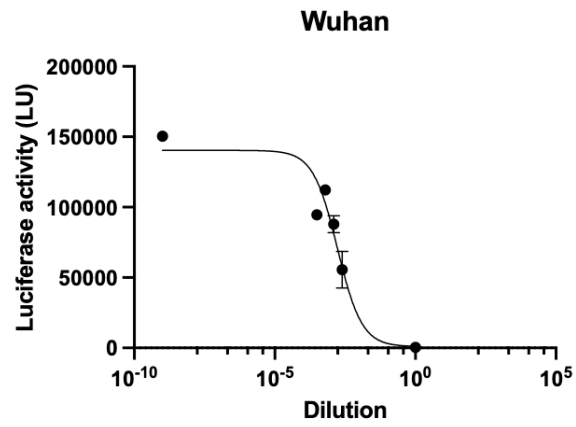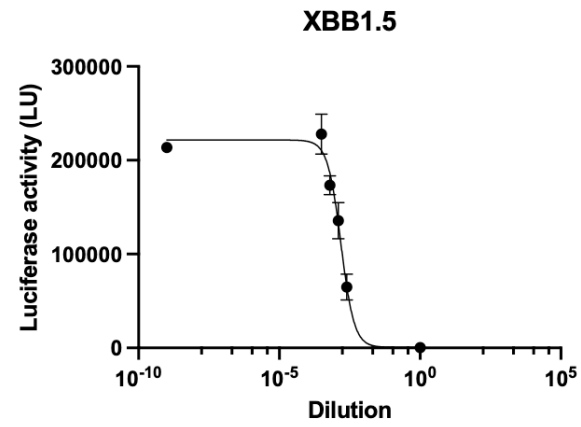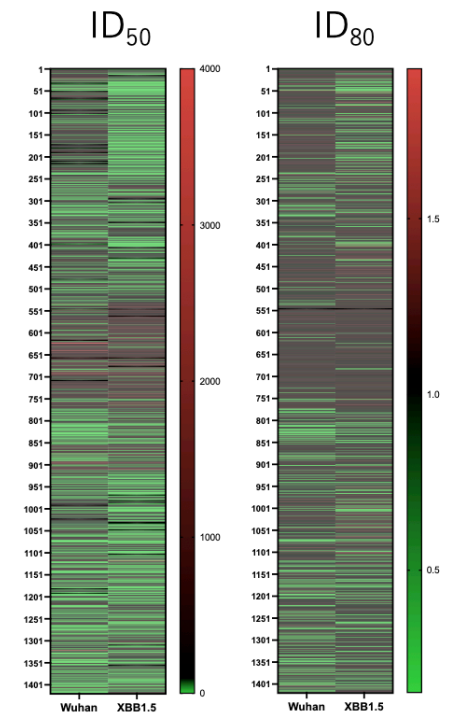

Supplementary Figure 3. Correlation between Wuhan authentic virus and pseudo virus neutralization activity (ID50)

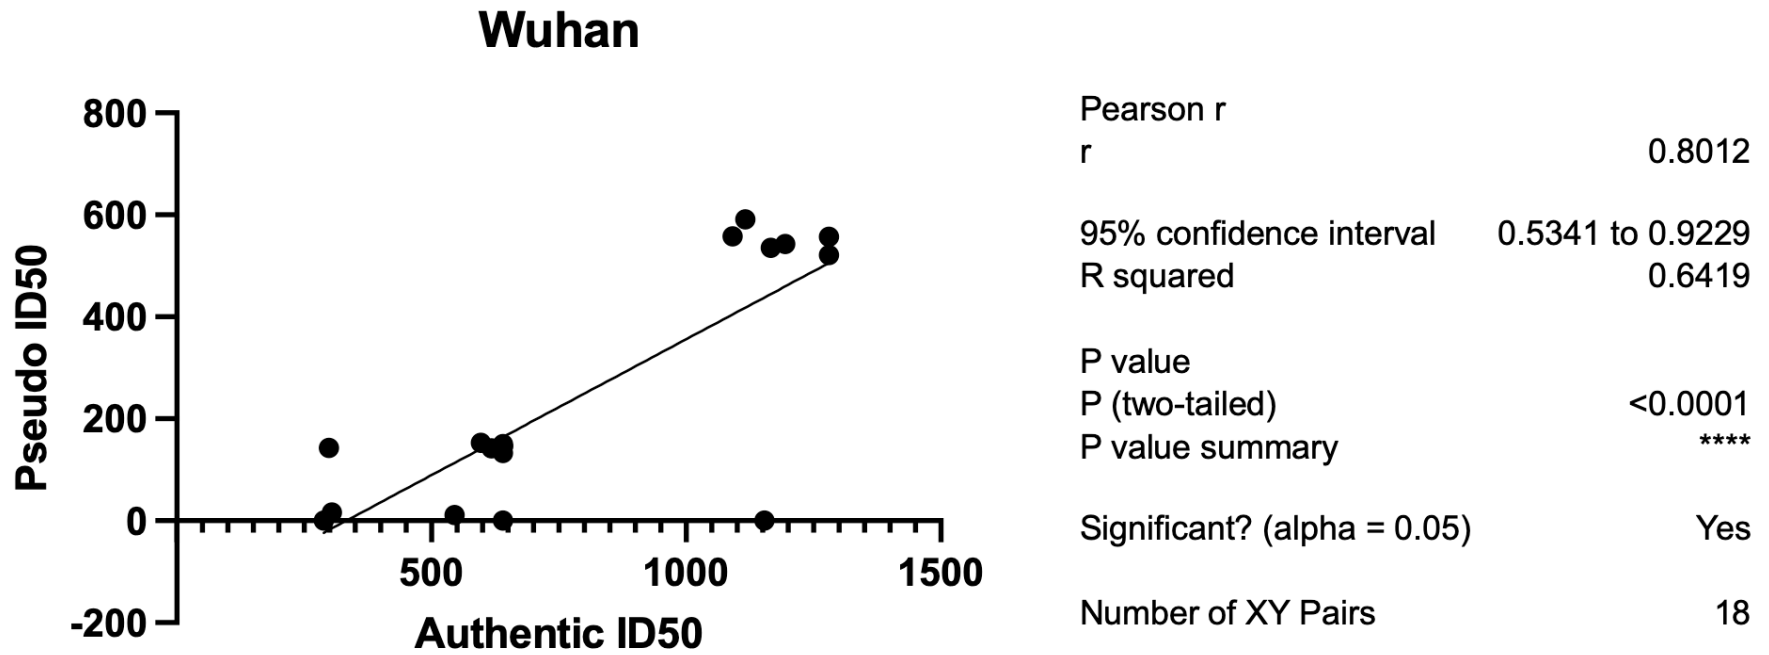

Eighteen human samples were plotted. One outlier sample was excluded by ROUT.

Supplementary Figure 4. Correlation between XBB1.5 authentic virus and pseudo virus neutralization activity (ID<sub>50</sub>)

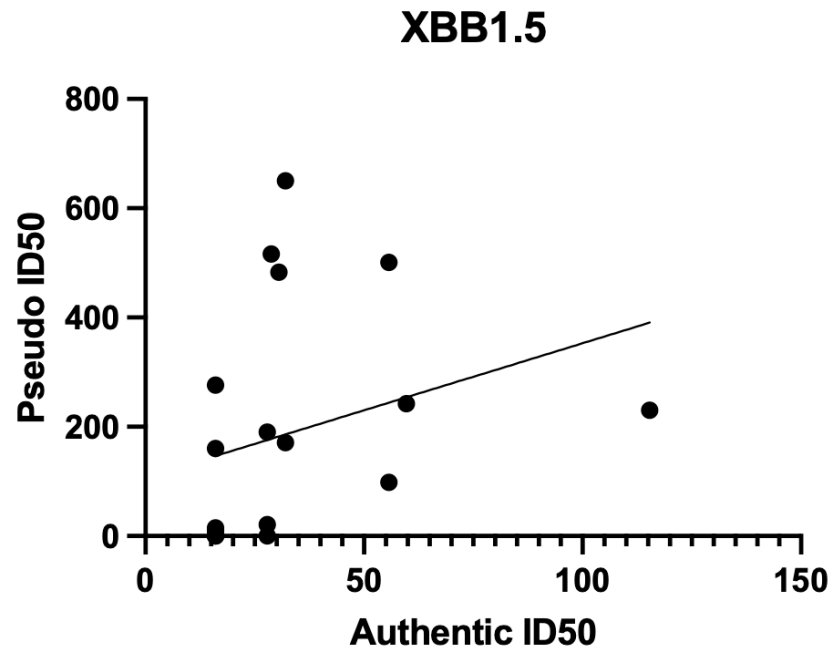

|                               |                  |
|-------------------------------|------------------|
| Spearman r                    |                  |
| r                             | 0.6229           |
| 95% confidence interval       | 0.2215 to 0.8438 |
| P value                       |                  |
| P (two-tailed)                | 0.0044           |
| P value summary               | **               |
| Exact or approximate P value? | Approximate      |
| Significant? (alpha = 0.05)   | Yes              |
| Number of XY Pairs            | 19               |

Nineteen human samples were plotted.

**Supplementary Figure 5. Correlation between IgG(S) and Pseudo virus neutralization activity, Wuhan authentic virus neutralization activity**

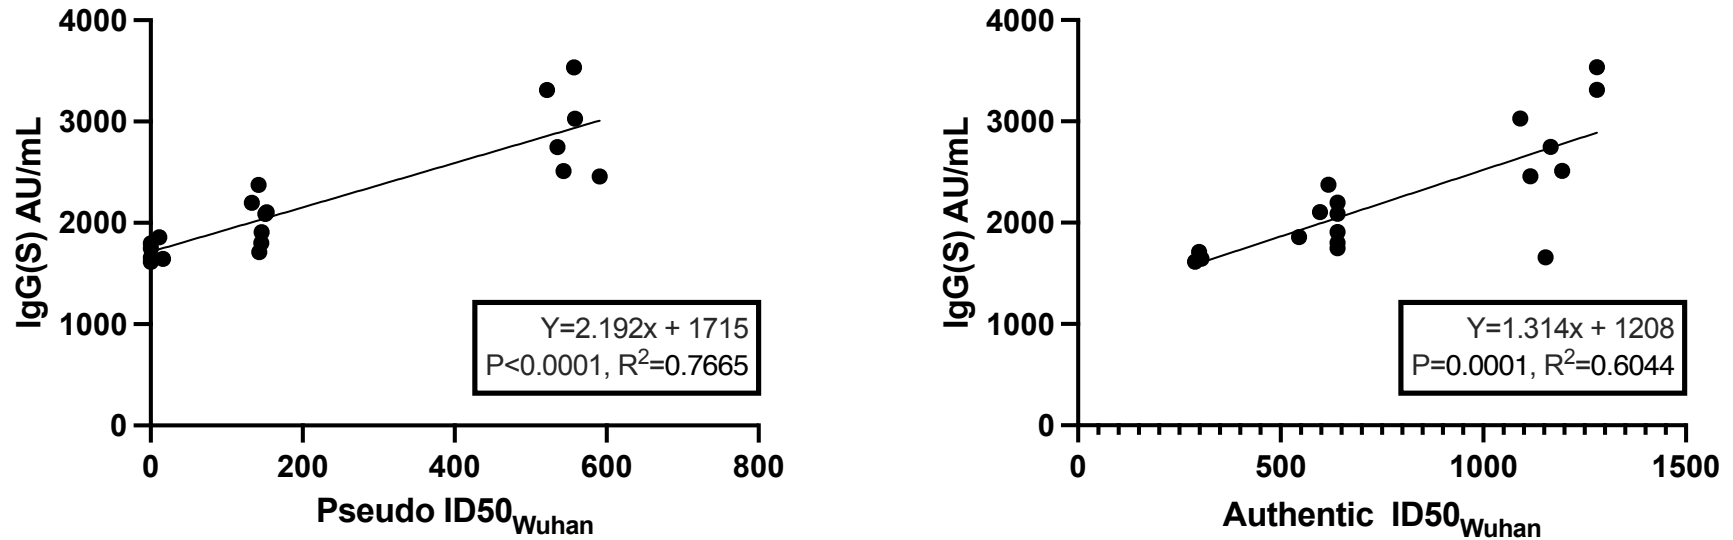

The scatter plot on the left for pseudo-virus neutralization activity includes plots for 19 samples, and that on the right for authentic virus neutralization activity excludes one outlier by robust regression and outlier removal (ROUT) (the same sample as in Supplementary Figure 3, resulting in plots for 18 samples). The simple linear regression analysis is conducted.



Supplementary Figure 6. Distribution of age and days elapsed from the last vaccination

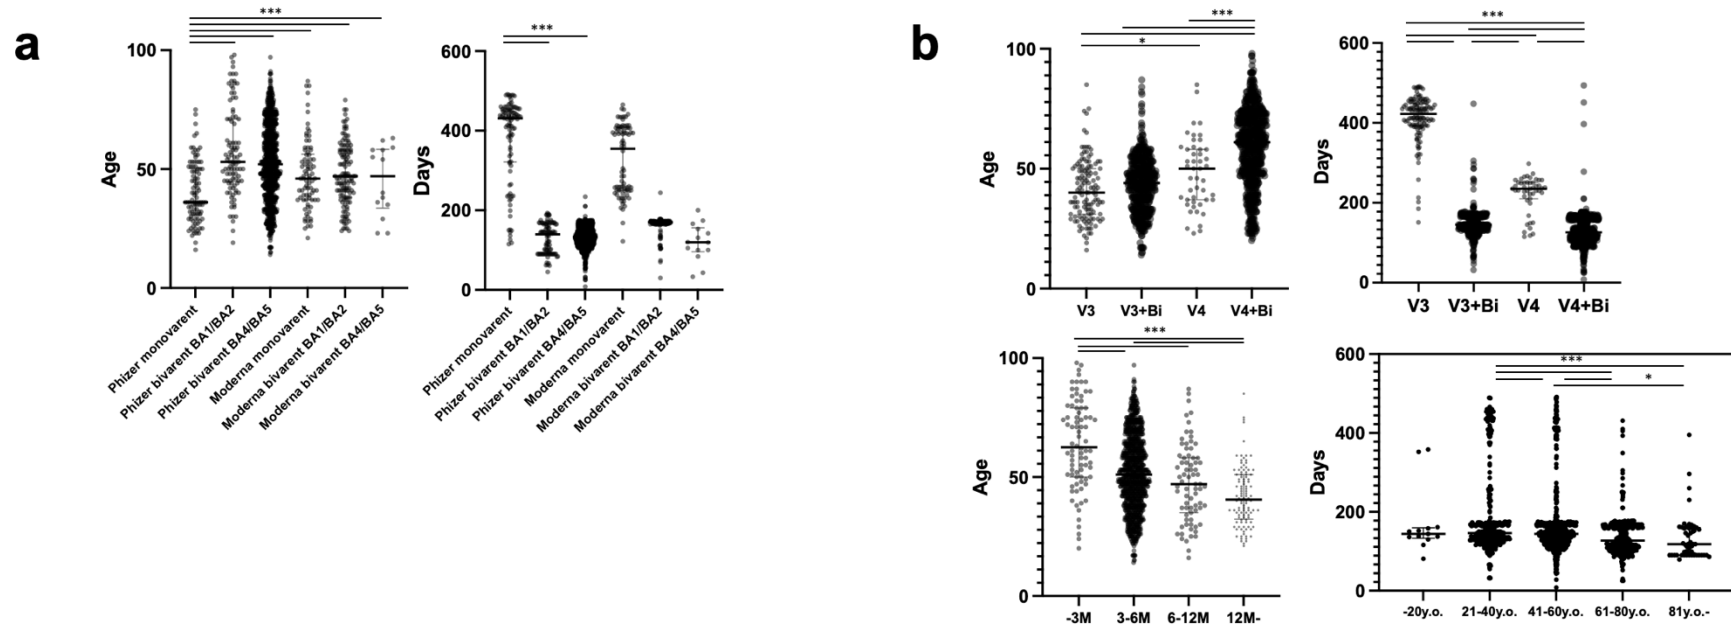

(a) distribution of age and time elapsed since last vaccination by vaccine type, we conducted a Tukey's Honestly Significant Difference (HSD) post-hoc test as part of an ANOVA for multiple comparisons and documented the significance of responses to the Pfizer monovalent vaccine in the figure. (b) distribution of age and time elapsed since last vaccination by number of vaccine doses and time elapsed, months; M, years old; y.o. We conducted a Tukey's HSD post-hoc test as part of an ANOVA for multiple comparisons\*,  $p < 0.05$ , \*\*,  $p < 0.01$ , \*\*\*,  $p < 0.001$

**Supplementary Figure 7. Distribution of age and days elapsed from the last vaccination.**

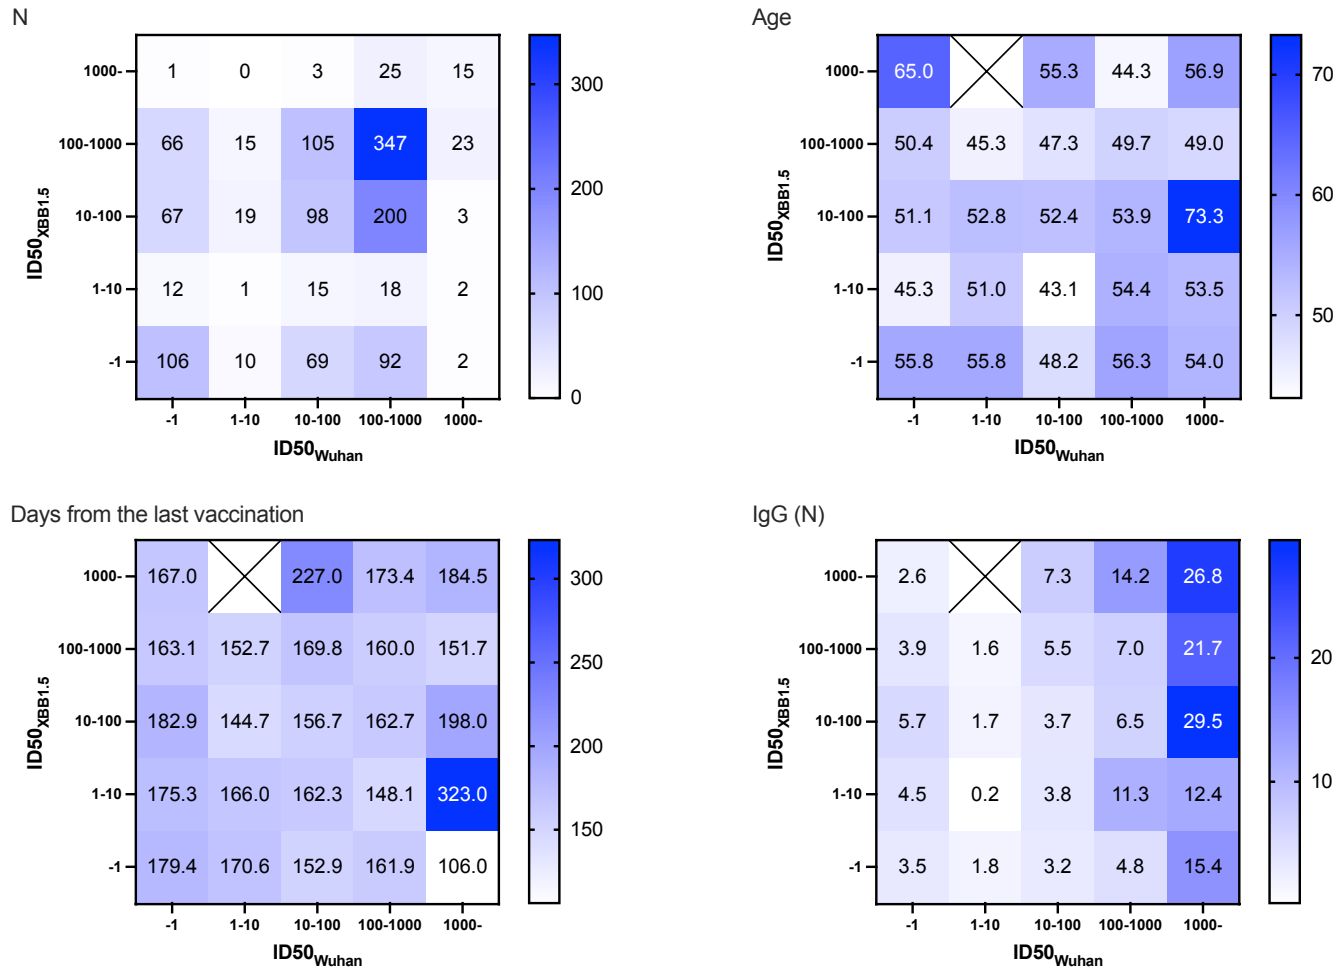

Supplementary Figure 8. Distribution of age and days elapsed from the last vaccination.

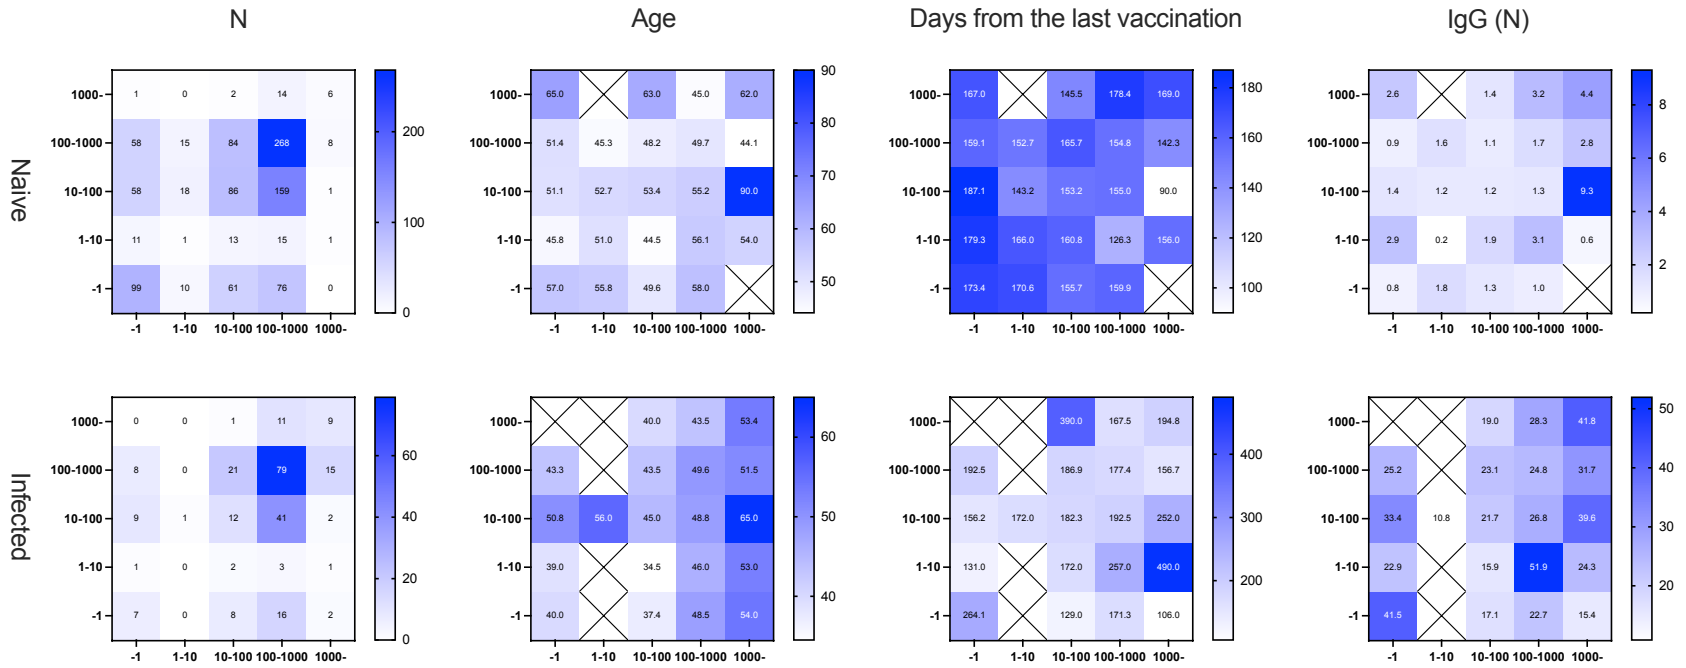

Supplementary Figure 9. Distribution of age and days elapsed from the last vaccination

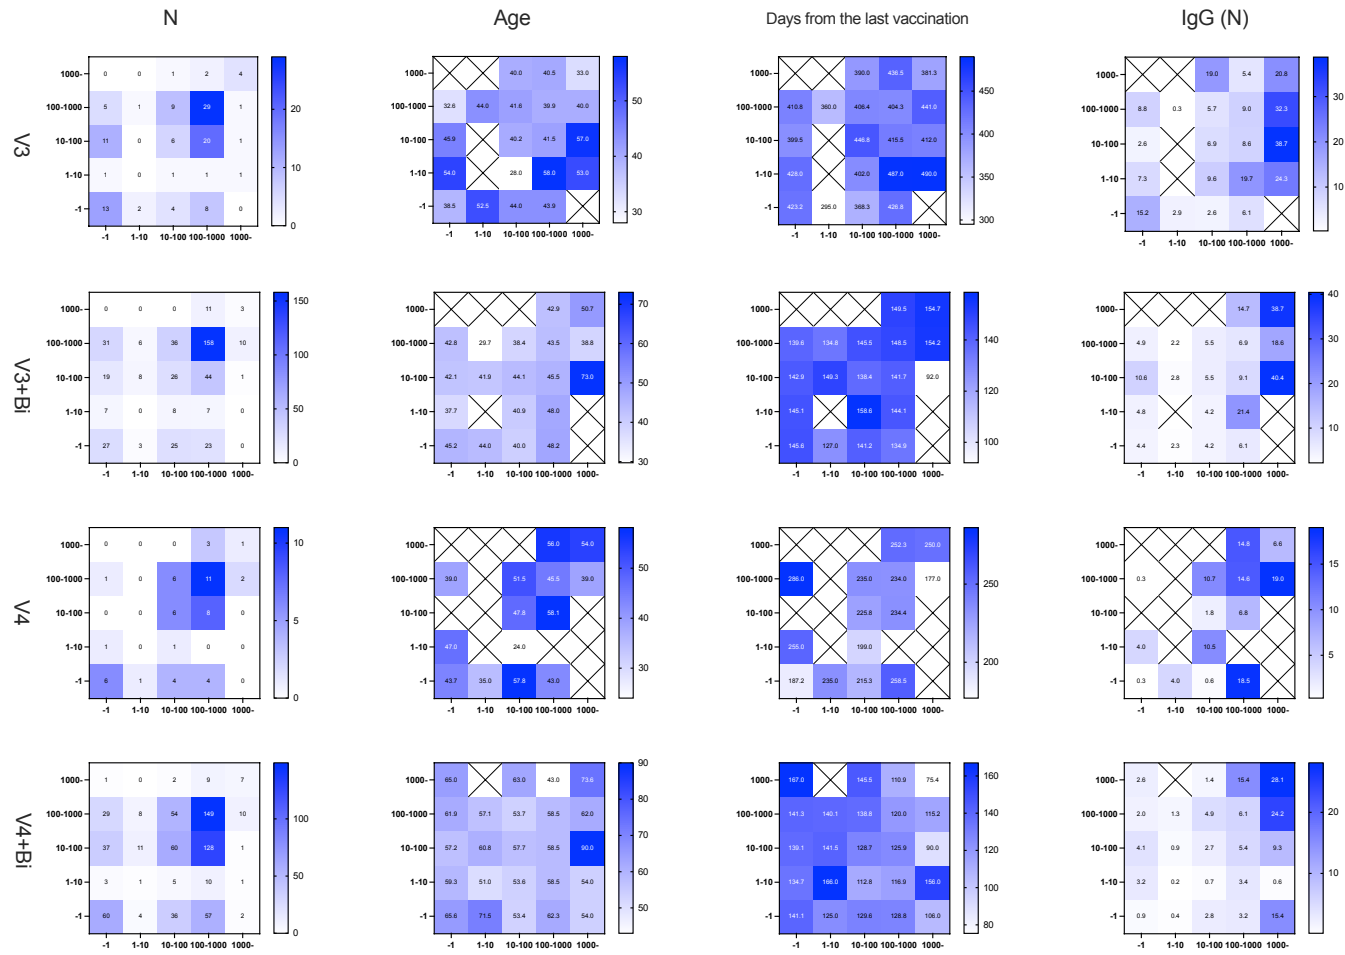

# Supplementary Figure 10. Distribution of age and days elapsed from the last vaccination

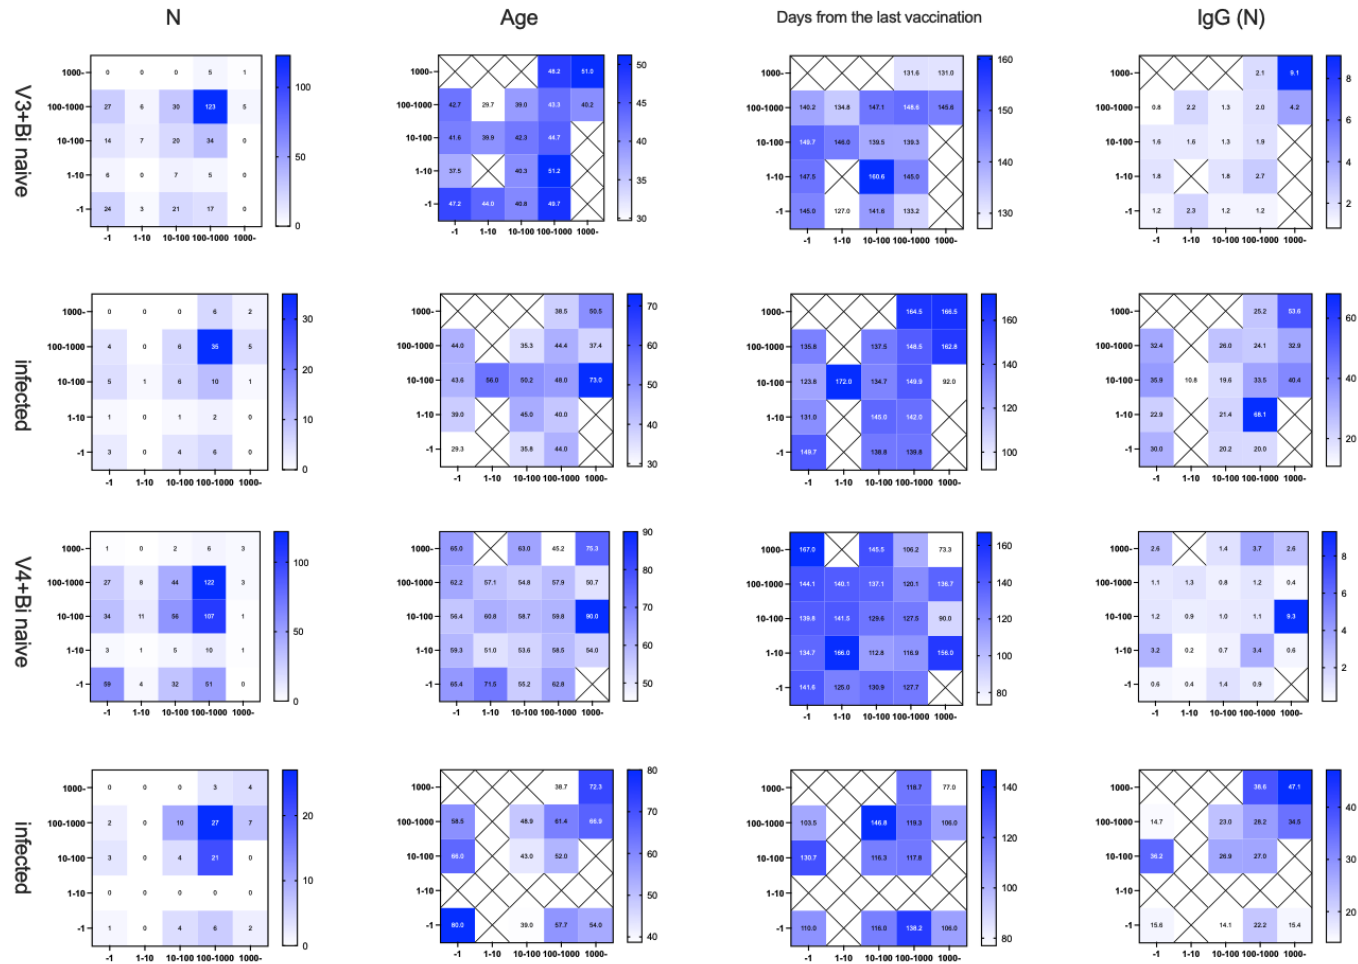

Supplement: DataSheet_1.pdf [file DataSheet_1.pdf]
